# Supplementary material for: Duration of Treatment for Pseudomonas aeruginosa Bacteremia: a Retrospective Study
Source: PubMed Central journal article supplement — Infect Dis Ther. 2022 May 25;11(4):1505–19. doi: 10.1007/s40121-022-00657-1 (PMC9334465; doi:10.1007/s40121-022-00657-1), 2022-05-25

## SUPPLEMENTARY MATERIAL

### **Duration of treatment for *Pseudomonas aeruginosa* bacteremia – a retrospective study**

Tanya Babich<sup>1,2</sup>, Pontus Naucler<sup>3</sup>, John Karlsson Valik<sup>3</sup>, Christian G. Giske<sup>4</sup>, Natividad Benito<sup>5</sup>, Ruben Cardona<sup>6</sup>, Alba Rivera<sup>7</sup>, Celine Pulcini<sup>8,9</sup>, Manal Abdel Fattah<sup>9</sup>, Justine Haquin<sup>9</sup>, Alasdair Macgowan<sup>10</sup>, Sally Grier<sup>10</sup>, Bibiana Chazan<sup>11</sup>, Anna Yanovskay<sup>11</sup>, Ronen Ben Ami<sup>1,12</sup>, Michal Landes<sup>12</sup>, Lior Neshet<sup>13</sup>, Adi Zaidman-Shimshovitz<sup>13</sup>, Kate McCarthy<sup>14</sup>, David L Paterson<sup>14</sup>, Evelina Tacconelli<sup>15</sup>, Michael Buhl<sup>15</sup>, Susanna Mauer<sup>15</sup>, Jesús Rodríguez-Baño<sup>16</sup>, Marina de Cueto<sup>16</sup>, Antonio Oliver<sup>17</sup>, Enrique Ruiz de Gopegui<sup>17</sup>, Angela Cano<sup>18</sup>, Isabel Machuca<sup>18</sup>, Monica Gozalo-Marguello<sup>19</sup>, Luis Martinez-Martinez<sup>19</sup>, Eva M Gonzalez-Barbera<sup>20</sup>, Iris Gomez Alfaro<sup>20</sup>, Miguel Salavert<sup>21</sup>, Bojana Beovic<sup>22</sup>, Andreja Saje<sup>22</sup>, Manica Mueller-Premru<sup>23</sup>, Leonardo Pagani<sup>24</sup>, Virginie Vitrat<sup>24</sup>, Diamantis Kofteridis<sup>25</sup>, Maria Zacharioudaki<sup>25</sup>, Sofia Maraki<sup>25</sup>, Yulia Weissman<sup>1</sup>, Mical Paul<sup>26</sup>, Yaakov Dickstein<sup>26</sup>, Leonard Leibovici<sup>2</sup>, Dafna Yahav<sup>27</sup>

<sup>1</sup> Sackler Faculty of Medicine, Tel Aviv University, Israel

<sup>2</sup> Research Authority, Rabin Medical Center, Beilinson hospital, Petah-Tikva, Israel

<sup>3</sup> Division of Infectious Diseases, Department of Medicine Solna, Karolinska Institutet. Department of Infectious Diseases, Karolinska University Hospital, Stockholm, Sweden

<sup>4</sup> Department of Laboratory medicine, Karolinska Institutet and Department of Clinical microbiology, Karolinska University Hospital, Stockholm, Sweden

<sup>5</sup> Infectious Diseases Unit, Department of Internal Medicine, Hospital de la Santa Creu i Sant Pau - Institut d'Investigació Biomèdica Sant Pau. Universitat Autònoma de Barcelona, Barcelona, Spain

<sup>6</sup> Department of Internal Medicine, Hospital de la Santa Creu i Sant Pau, Barcelona, Spain

<sup>7</sup> Department of Microbiology, Hospital de la Santa Creu i Sant Pau - Institut d'Investigació Biomèdica Sant Pau, Barcelona, Spain

<sup>8</sup> Université de Lorraine, APEMAC, F-54000 Nancy, France

<sup>9</sup> Université de Lorraine, CHRU-Nancy, Infectious Diseases Department, F-54000 Nancy, France

<sup>10</sup> Department of Infection Sciences, Pathology Sciences Building, Southmead Hospital, Bristol, UK

<sup>11</sup> Infectious Diseases Unit, Emek Medical Center, Afula, Rappaport Faculty of Medicine, Technion, Haifa, Israel

<sup>12</sup> Infectious Diseases Unit, Sourasky Medical Center, Tel-Aviv, Israel

<sup>13</sup> Infectious Disease Institute, Soroka Medical Center, Ben-Gurion University of the Negev, Beer Sheva, Israel

<sup>14</sup> UQ Centre for Clinical Research, The University of Queensland, Brisbane, Australia

- <sup>15</sup> Division of Infectious Diseases, Tuebingen University Hospital, Tuebingen, Germany
- <sup>16</sup> Unidad Clínica de Enfermedades Infecciosas and Microbiología, Hospital Universitario Virgen Macarena / Departamentos de Medicina y Microbiología, Universidad de Sevilla / Instituto de Biomedicina de Sevilla (IBiS), Seville, Spain, and Centro de Investigación Biomédica en Red en Enfermedades Infecciosas (CIBERINFEC).
- <sup>17</sup> Servicio de Microbiología & Unidad de Investigación, Hospital Universitario Son Espases, Instituto de Investigación Illes Balears (IdISBa), Palma de Mallorca, Spain
- <sup>18</sup> Infectious Diseases Unit, Maimonides Biomedical Research Institute of Cordoba (IMIBIC). Reina Sofia University Hospital. University of Cordoba, Spain
- <sup>19</sup> Microbiology Service, University Hospital Marqués de Valdecilla-IDIVAL, Santander, Spain
- <sup>20</sup> Microbiology Department, La Fe University Hospital, Valencia, Spain
- <sup>21</sup> Infectious Diseases Unit, Hospital Universitario y Politécnico La Fe, Valencia, Spain
- <sup>22</sup> Department of Infectious Diseases, University Medical Centre, Ljubljana; Faculty of Medicine, University of Ljubljana, Slovenia
- <sup>23</sup> Institute of microbiology and immunology, Faculty of Medicine, University of Ljubljana, Slovenia
- <sup>24</sup> Infectious Diseases Unit, Annecy-Genevois Hospital Center (CHANGE), Annecy, France
- <sup>25</sup> Infectious Disease Unit, Department of Internal Medicine, University Hospital of Heraklion, Heraklion, Crete, Greece
- <sup>26</sup> Infectious Diseases Unit, Rambam Health Care Campus, Haifa, Israel
- <sup>27</sup> Infectious Diseases Unit, Sheba medical center, Ramat-Gan, Israel

Corresponding author: Prof. Dafna Yahav, Infectious Diseases Unit, Sheba Medical Center, 2 Sheba Road, Ramat-Gan, 52621, Israel. Phone: 972-3-5303500. E-mail: [dafna.yahav@gmail.com](mailto:dafna.yahav@gmail.com)

**Supplemental Table 1: Baseline characteristics used to estimate the propensity score (PS) and standardized mean difference in unweighted and weighted samples**

| Covariates | Weighted data            |                         | SMD | Unweighted data          |                         | SMD |
|------------|--------------------------|-------------------------|-----|--------------------------|-------------------------|-----|
|            | Short treatment<br>N=273 | Long treatment<br>N=384 |     | Short treatment<br>N=273 | Long treatment<br>N=384 |     |
|            |                          |                         |     |                          |                         |     |

|                                    |       |       |       |       |       |       |
|------------------------------------|-------|-------|-------|-------|-------|-------|
| Age at infection                   | 64.89 | 64.48 | 0.025 | 66.10 | 64.13 | 0.125 |
| Gender                             | 0.36  | 0.35  | 0.019 | 0.37  | 0.35  | 0.056 |
| Weight                             | 73.58 | 73.52 | 0.001 | 73.40 | 73.33 | 0.004 |
| Congestive heart failure           | 0.15  | 0.14  | 0.006 | 0.15  | 0.13  | 0.055 |
| Solid metastatic                   | 0.15  | 0.15  | 0.005 | 0.12  | 0.15  | 0.076 |
| Hemiplegia                         | 0.07  | 0.07  | 0.010 | 0.05  | 0.07  | 0.089 |
| Diabetes with end organ damage     | 0.12  | 0.11  | 0.020 | 0.13  | 0.10  | 0.111 |
| Dementia                           | 0.06  | 0.06  | 0.015 | 0.07  | 0.05  | 0.061 |
| Mod-severe renal disease           | 0.10  | 0.11  | 0.035 | 0.09  | 0.13  | 0.115 |
| Chronic pulmonary disease          | 0.17  | 0.17  | 0.017 | 0.15  | 0.19  | 0.096 |
| Mild liver disease                 | 0.04  | 0.04  | 0     | 0.04  | 0.03  | 0.052 |
| Mod-severe liver disease           | 0.03  | 0.03  | 0     | 0.02  | 0.03  | 0.057 |
| Rheumatic disease                  | 0.08  | 0.08  | 0     | 0.08  | 0.09  | 0.046 |
| Any malignancy                     | 0.42  | 0.42  | 0     | 0.42  | 0.42  | 0.001 |
| Previous hospitalization (90 days) | 0.58  | 0.58  | 0     | 0.58  | 0.55  | 0.054 |
| Arterial line                      | 0.20  | 0.21  | 0.025 | 0.14  | 0.16  | 0.064 |
| Central venous line                | 0.28  | 0.28  | 0.008 | 0.47  | 0.48  | 0.027 |
| Urinary catheter                   | 0.41  | 0.40  | 0.020 | 0.41  | 0.37  | 0.085 |
| Any foreign body                   | 0.20  | 0.21  | 0.025 | 0.19  | 0.19  | 0.094 |
| Corticosteroids                    | 0.21  | 0.21  | 0     | 0.25  | 0.20  | 0.14  |
| Previous surgery (90 days)         | 0.26  | 0.27  | 0.005 | 0.25  | 0.27  | 0.043 |
| Chronic dialysis                   | 0.04  | 0.04  | 0     | 0.03  | 0.04  | 0.056 |
| Intravenous drug use               | 0.02  | 0.02  | 0     | 0.02  | 0.01  | 0.093 |
| Neutropenia                        | 0.23  | 0.22  | 0.010 | 0.21  | 0.22  | 0.045 |
| SOFA score                         | 3.72  | 3.79  | 0.032 | 3.30  | 3.72  | 0.151 |

|                 |       |       |       |        |        |       |
|-----------------|-------|-------|-------|--------|--------|-------|
| Temperature     | 38.52 | 38.52 | 0.014 | 38.48  | 38.52  | 0.047 |
| Systolic blood  | 104.6 | 103.9 | 0.022 | 103.47 | 104.37 | 0.039 |
| Diastolic blood | 58.42 | 58.32 | 0.006 | 56.94  | 57.94  | 0.072 |
| Leukocytes      | 10.81 | 10.52 | 0.024 | 11.30  | 10.23  | 0.111 |
| Neutrophils     | 9.22  | 8.96  | 0.027 | 9.13   | 8.52   | 0.071 |

SMD – standardized mean difference

### Supplementary Figure 1: Flow chart of patient selection

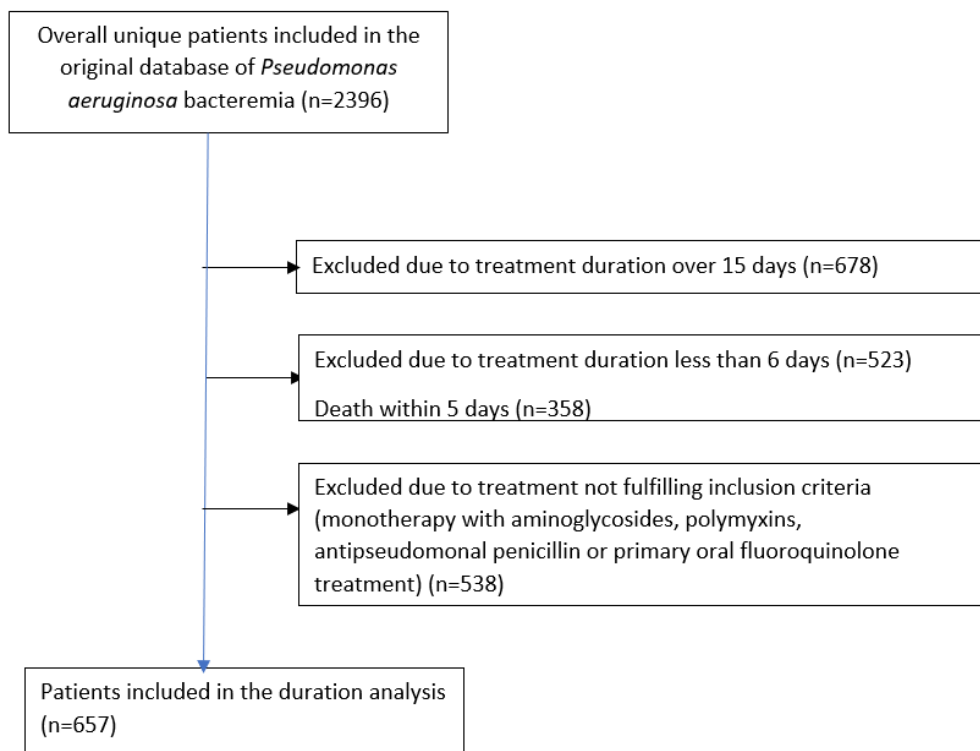

Supplement: 40121_2022_657_MOESM1_ESM.pdf [file 40121_2022_657_MOESM1_ESM.pdf]
